# Supplementary material for: Use of lead isotopic ratios to discriminate glass samples in forensic science
Source: Royal Society of Chemistry journal article supplement (doi:10.1039/c0ja00054j), 2010-10-05
Supplement: c0ja00054j.csv [file c0ja00054j.csv]

Sample	A208/204	ASd	B207/204	BSd	C206/204	CSd	D208/206	DSd	E207/206	ESd											FractTl/FractPb
A-19	36.42964	0.88800	15.17920	0.30800	17.77873	0.42300	2.04356	0.00522	0.86512	0.00693	-0.83423	0.28600	5.05298	0.24800	5.06251	0.72100	3.31889	0.47300	0.00004	0.00000	-1.27230	0.29700	1.530536	1.38E-01	A-19	S	A-19	27.03.09
A-01-II	38.54605	0.00139	15.68550	0.00061	19.77657	0.00078	1.94914	0.00003	0.79314	0.00001	-1.77734	0.00108	9.20923	0.00092	7.05216	0.00343	5.98807	0.00383	0.00005	0.00000	-5.18284	0.00297	2.723976	4.51E-01	A-01-II	S	A-01-II	26.03.09
A-01-II	38.55405	0.00157	15.68811	0.00064	19.77978	0.00073	1.94915	0.00003	0.79314	0.00001	-1.77850	0.00101	9.20775	0.00101	7.11199	0.00278	6.06120	0.00248	0.00005	0.00000	-5.17749	0.00300	1.694483	1.21E-01	A-01-II	S	A-01-II	26.03.09
A-01-II	38.55421	0.00129	15.68825	0.00047	19.78045	0.00061	1.94907	0.00002	0.79311	0.00001	-1.68301	0.00110	9.30659	0.00079	6.36095	0.00586	5.26091	0.00504	0.00008	0.00000	-5.53018	0.00389	1.869934	9.06E-02	A01-II	S	A-01-II	21.01.09
A-03-1	36.5205	0.89100	15.14365	0.32700	17.84305	0.41200	2.08576	0.00568	0.86219	0.00371	-0.67137	0.29100	3.31089	0.20400	2.81158	0.48500	2.50688	0.43300	0.00004	0.00000	-0.86075	0.25500	1.682155	1.97E-01	A-03-	S	A-03-1	26.03.09
A-03-1	38.33763	0.00162	15.62176	0.00065	18.49022	0.00074	2.07337	0.00003	0.84484	0.00001	-1.69900	0.00118	2.90044	0.00104	6.08607	0.00327	5.10810	0.00406	0.00009	0.00000	-1.70703	0.00152	2.282975	1.42E-01	A03-1	S	A-03-1	21.01.09
A-03-1	38.34225	0.00193	15.62321	0.00078	18.49185	0.00098	2.07351	0.00002	0.84488	0.00001	-1.79965	0.00079	2.79348	0.00088	6.94263	0.00302	6.13912	0.00343	0.00005	0.00000	-1.55308	0.00080	1.52598	9.61E-02	A-03-I	S	A-03-1	26.03.09
A-06	38.32262	0.00098	15.62110	0.00040	18.52112	0.00044	2.06919	0.00002	0.84344	0.00001	-1.67484	0.00133	3.13453	0.00109	9.50543	0.00717	4.84484	0.00334	0.00008	0.00000	-1.87135	0.00191	2.142964	1.46E-01	A-06	S	A-06	21.01.09
A-06	38.34208	0.00138	15.62768	0.00050	18.52652	0.00049	2.06956	0.00003	0.84351	0.00001	-1.82659	0.00098	2.96247	0.00076	10.26281	0.00591	6.04695	0.00579	0.00005	0.00000	-1.62157	0.00099	1.88318	1.59E-01	A-06	S	A-06	26.03.09
A-06	38.34473	0.00126	15.62828	0.00049	18.52715	0.00055	2.06959	0.00002	0.84352	0.00001	-1.82099	0.00116	2.96649	0.00076	10.20734	0.00488	6.06345	0.00391	0.00004	0.00000	-1.62970	0.00118	2.405271	2.58E-01	A-06	S	A-06	26.03.09
A-105	38.50279	0.00192	15.67783	0.00076	19.82605	0.00081	1.94198	0.00004	0.79074	0.00001	-1.77291	0.00161	9.59374	0.00129	4.53182	0.00401	3.16488	0.00279	0.00003	0.00000	-5.41126	0.00479	1.220598	6.11E-01	A-105	S	A-105	21.04.09
A-105	38.50505	0.00219	15.67866	0.00084	19.82771	0.00101	1.94200	0.00004	0.79074	0.00002	-1.77773	0.00143	9.58756	0.00114	4.48898	0.00294	3.13675	0.00210	0.00004	0.00000	-5.39366	0.00412	0.3467723	5.41E-01	A-105	S	A-105	21.04.09
A-105	38.50986	0.00160	15.68051	0.00064	19.83005	0.00082	1.94199	0.00003	0.79073	0.00001	-1.76947	0.00141	9.59774	0.00130	4.58270	0.00592	3.20059	0.00419	0.00004	0.00000	-5.42397	0.00446	2.576569	4.07E-01	A-105	S	A-105	21.04.09
A-107	38.50244	0.00179	15.68006	0.00076	19.64880	0.00092	1.95949	0.00003	0.79802	0.00001	-1.78836	0.00129	8.64882	0.00114	4.61813	0.00554	4.16640	0.00500	0.00004	0.00000	-4.83456	0.00374	1.387903	1.25E-01	A-107	S	A-107	21.04.09
A-107	38.50389	0.00173	15.68060	0.00072	19.64950	0.00086	1.95954	0.00003	0.79803	0.00001	-1.80074	0.00125	8.63742	0.00168	4.68352	0.00219	4.22373	0.00211	0.00004	0.00000	-4.79633	0.00395	1.382368	2.69E-01	A-107	S	A-107	21.04.09
A-107	38.50597	0.00192	15.68123	0.00075	19.65051	0.00090	1.95953	0.00003	0.79802	0.00001	-1.80427	0.00110	8.63325	0.00129	4.63856	0.00328	4.18809	0.00321	0.00004	0.00000	-4.78454	0.00327	1.54365	1.27E-01	A-107	S	A-107	21.04.09
A-107	38.51429	0.00202	15.68471	0.00082	19.65378	0.00096	1.95958	0.00002	0.79805	0.00001	-1.80748	0.00106	8.62727	0.00105	4.67482	0.00198	4.22032	0.00174	0.00004	0.00000	-4.77266	0.00302	1.196373	3.04E-01	A-107	S	A-107	21.04.09
A-11,1	38.2921	0.00224	15.62561	0.00086	18.41879	0.00099	2.07900	0.00002	0.84837	0.00001	-1.83907	0.00134	2.48173	0.00118	5.30786	0.00303	3.28717	0.00316	0.00004	0.00000	-1.34891	0.00129	2.16527	2.14E-01	A-11,1	S	A-11,1	11.12.18
A-11,1	38.30100	0.00171	15.62812	0.00066	18.42211	0.00075	2.07894	0.00002	0.84834	0.00001	-1.84260	0.00120	2.48091	0.00092	10.20268	0.00571	3.37322	0.00267	0.00004	0.00000	-1.34591	0.00111	2.42001	0.41900	A-11,1	S	A-11,1	11.12.18
A-11,1	38.30438	0.00118	15.63062	0.00046	18.42543	0.00050	2.07887	0.00002	0.84832	0.00001	-1.84613	0.00105	2.48010	0.00066	15.09749	0.00839	3.45927	0.00217	0.00004	0.00000	-1.34290	0.00093	2.674747	6.24E-01	A-11,1	S	A-11,1	11.12.18
A-119	38.45615	0.00441	15.68218	0.00181	19.85448	0.00229	1.93692	0.00003	0.78987	0.00001	-1.85787	0.00103	9.77945	0.00108	3.74460	0.00242	4.25431	0.00281	0.00004	0.00000	-5.26497	0.00319	1.709532	3.19E-01	A-119	S	A-119	21.04.09
A-119	38.45677	0.00228	15.68268	0.00094	19.85485	0.00108	1.93686	0.00003	0.78983	0.00001	-1.86470	0.00085	9.77692	0.00105	3.75510	0.00145	4.26441	0.00171	0.00004	0.00000	-5.24485	0.00253	2.046452	2.86E-01	A-119	S	A-119	21.04.09
A-119	38.46719	0.00258	15.68557	0.00098	19.85966	0.00123	1.93684	0.00003	0.78982	0.00001	-1.86698	0.00101	9.77295	0.00122	3.70730	0.00266	4.20852	0.00309	0.00004	0.00000	-5.23405	0.00313	1.678856	1.47E-01	A-119	S	A-119	21.04.09
A-13	38.0275	0.00130	15.61245	0.00051	18.47858	0.00054	2.05796	0.00002	0.84491	0.00001	-1.53332	0.00235	3.83754	0.00289	8.24899	0.00924	5.78747	0.00619	0.00008	0.00000	-2.50202	0.00566	2.226788	1.13E-01	A-13	S	A-13	21.01.09
A-13	38.02931	0.00133	15.61270	0.00053	18.47782	0.00061	2.05813	0.00003	0.84494	0.00001	-1.95746	0.00260	3.40727	0.00236	9.26853	0.01180	6.78513	0.00766	0.00003	0.00000	-1.74033	0.00346	1.341481	1.10E-01	A-13'	S	A-13	27.03.09
A-13	38.02998	0.00125	15.61319	0.00049	18.47865	0.00051	2.05799	0.00002	0.84492	0.00001	-1.94932	0.00106	3.41936	0.00093	9.17586	0.00783	6.68591	0.00785	0.00004	0.00000	-1.75438	0.00126	1.314293	1.34E-01	A-13	S	A-13	27.03.09
A-135	38.37615	0.00150	15.77570	0.00063	18.52255	0.00072	2.07186	0.00002	0.85170	0.00001	-1.84975	0.00110	2.82438	0.00087	8.75633	0.00360	4.12620	0.00175	0.00005	0.00000	-1.52787	0.00110	2.721205	3.19E-01	A-135	S	A-135	21.04.09
A-135	38.38136	0.00087	15.77811	0.00033	18.52543	0.00041	2.07184	0.00002	0.85170	0.00001	-1.84108	0.00107	2.83453	0.00098	8.79963	0.00365	4.14982	0.00188	0.00004	0.00000	-1.53931	0.00114	1.742486	1.70E-01	A-135	S	A-135	21.04.09
A-135	38.38237	0.00190	15.77823	0.00076	18.52529	0.00088	2.07189	0.00002	0.85171	0.00001	-1.87229	0.00093	2.80038	0.00126	10.20157	0.01580	5.95536	0.00978	0.00005	0.00000	-1.49498	0.00129	2.634819	3.44E-01	A-135	S	A-135	22.04.09
A-137	38.55699	0.00311	15.69306	0.00128	19.90371	0.00163	1.93719	0.00003	0.78844	0.00001	-1.88098	0.00129	9.74192	0.00168	4.59787	0.01140	5.51449	0.01370	0.00005	0.00000	-5.17967	0.00420	2.317403	2.81E-01	A-137	S	A-137	22.04.09
A-137	38.56146	0.00421	15.69484	0.00186	19.90458	0.00219	1.93726	0.00002	0.78847	0.00001	-1.86876	0.00120	9.75089	0.00118	4.54734	0.00983	5.45582	0.01200	0.00006	0.00000	-5.21795	0.00371	2.070312	1.10E-01	A-137	S	A-137	22.04.09
A-137	38.57116	0.00351	15.69880	0.00148	19.91178	0.00187	1.93715	0.00002	0.78842	0.00001	-1.87407	0.00099	9.74977	0.00162	4.55246	0.01260	5.45637	0.01520	0.00005	0.00000	-5.20128	0.00316	2.223938	3.63E-01	A-137	S	A-137	22.04.09
A-138	38.54369	0.00298	15.68856	0.00119	19.89492	0.00156	1.93742	0.00003	0.78859	0.00001	-1.83625	0.00161	9.77329	0.00144	4.07913	0.00821	3.37426	0.00698	0.00003	0.00000	-5.32289	0.00515	1.676791	1.48E-01	A-138	S	A-138	22.04.09
A-138	38.54704	0.00215	15.68929	0.00090	19.89603	0.00102	1.93735	0.00003	0.78856	0.00001	-1.87839	0.00138	9.73496	0.00132	4.00293	0.00535	3.31126	0.00464	0.00003	0.00000	-5.18184	0.00425	0.9639769	4.06E-01	A-138	S	A-138	22.04.09
A-138	38.54817	0.00303	15.69084	0.00116	19.89710	0.00150	1.93739	0.00003	0.78857	0.00001	-1.85973	0.00122	9.75113	0.00156	4.05399	0.00335	3.35604	0.00295	0.00003	0.00000	-5.24378	0.00380	1.125144	9.98E-02	A-138	S	A-138	22.04.09
A-139	38.56755	0.00803	15.69874	0.00334	19.89664	0.00426	1.93840	0.00005	0.78900	0.00003	-1.91454	0.00151	9.64555	0.00300	0.80318	0.00304	4.45317	0.01710	0.00006	0.00000	-5.03772	0.00475	2.288034	1.72E-01	A-139	S	A-139	22.04.09
A-139	38.56771	0.00593	15.69940	0.00221	19.89301	0.00302	1.93862	0.00006	0.78912	0.00002	-1.90757	0.00183	9.64117	0.00307	0.78374	0.00434	4.34446	0.02410	0.00005	0.00000	-5.05359	0.00596	2.715847	4.49E-01	A-139	S	A-139	22.04.09
A-139	38.5846	0.00832	15.70360	0.00321	19.90645	0.00439	1.93828	0.00006	0.78894	0.00002	-1.91477	0.00193	9.64688	0.00297	0.80550	0.00305	4.48036	0.01710	0.00005	0.00000	-5.03943	0.00581	2.382666	5.62E-01	A-139	S	A-139	22.04.09
A-14,1	37.71501	0.00186	15.61170	0.00072	17.76330	0.00082	2.12320	0.00002	0.87888	0.00001	-1.84260	0.00116	0.30181	0.00088	6.99904	0.00308	3.32498	0.00154	0.00004	0.00000	-0.16383	0.00051	1.79663	6.21E-01	A-14,1	S	A-14,1	11.12.18
A-14,1	37.72447	0.00183	15.61562	0.00070	17.76709	0.00080	2.12328	0.00002	0.87889	0.00001	-1.84380	0.00143	0.29835	0.00092	6.99728	0.00330	3.32764	0.00146	0.00004	0.00000	-0.16173	0.00060	1.604711	1.16E-01	A14,1	S	A-14,1	11.12.18
A-14,2	37.71278	0.00135	15.61396	0.00053	17.75858	0.00059	2.12363	0.00002	0.87924	0.00001	-1.83574	0.00113	0.28690	0.00096	8.17473	0.00789	3.16824	0.00165	0.00004	0.00000	-0.15599	0.00054	2.105178	2.98E-01	A-14,2	S	A-14,2	11.12.18
A-14,2	37.71465	0.00138	15.61490	0.00053	17.75898	0.00059	2.12365	0.00002	0.87924	0.00001	-1.83299	0.00107	0.28920	0.00095	8.34350	0.00766	3.23408	0.00350	0.00004	0.00000	-0.15800	0.00058	1.376471	2.31E-01	A-14,2	S	A-14,2	11.12.18
A-141	38.42973	0.00891	15.66986	0.00362	19.56587	0.00443	1.96399	0.00006	0.80082	0.00003	-1.90515	0.00177	8.29538	0.00341	0.76043	0.00348	4.59431	0.02100	0.00007	0.00000	-4.35401	0.00517	2.265103	1.28E-01	A-141	S	A-141	22.04.09
A-141	38.4321	0.00914	15.67020	0.00379	19.56972	0.00462	1.96383	0.00005	0.80072	0.00002	-1.92139	0.00198	8.29036	0.00280	0.74028	0.00381	4.47589	0.02450	0.00006	0.00000	-4.31452	0.00588	2.234976	2.88E-01	A-141	S	A-141	22.04.09
A-141	38.43494	0.00927	15.67115	0.00386	19.57065	0.00461	1.96387	0.00005	0.80076	0.00003	-1.90513	0.00223	8.29944	0.00287	0.75957	0.00360	4.58534	0.02190	0.00006	0.00000	-4.35774	0.00609	2.493318	2.29E-01	A-141	S	A-141	22.04.09
A-158	38.33471	0.00241	15.62527	0.00101	18.33090	0.00114	2.09118	0.00003	0.85236	0.00001	-1.91749	0.00156	1.79568	0.00179	3.86829	0.01640	5.59255	0.02470	0.00005	0.00000	-0.93644	0.00149	1.710878	1.52E-01	A-158	S	A-158	22.04.09
A-158	38.34362	0.00175	15.62846	0.00071	18.33554	0.00073	2.09121	0.00003	0.85237	0.00001	-1.90190	0.00191	1.81288	0.00247	3.71917	0.02320	5.37888	0.03380	0.00006	0.00000	-0.95299	0.00212	1.775319	1.07E-01	A-158	S	A-158	22.04.09
A-158	38.34419	0.00198	15.62878	0.00082	18.33566	0.00088	2.09122	0.00003	0.85237	0.00001	-1.90797	0.00161	1.80487	0.00170	3.92541	0.01420	5.69299	0.02080	0.00006	0.00000	-0.94615	0.00151	2.168401	1.56E-01	A-158	S	A-158	22.04.09
A-159	37.83665	0.00144	15.60231	0.00057	17.92930	0.00054	2.11034	0.00003	0.87022	0.00001	-1.92018	0.00153	0.85206	0.00176	7.74666	0.03070	4.40535	0.01740	0.00007	0.00000	-0.44356	0.00118	2.920438	5.10E-01	A-159	S	A-159	22.04.09
A-159	37.83685	0.00161	15.60241	0.00064	17.92948	0.00071	2.11031	0.00003	0.87021	0.00001	-1.91316	0.00132	0.85835	0.00190	7.78280	0.02610	4.43345	0.01490	0.00007	0.00000	-0.44837	0.00128	2.102677	1.57E-01	A-159	S	A-159	22.04.09
A-159	37.83912	0.00158	15.60375	0.00058	17.93033	0.00059	2.11032	0.00002	0.87024	0.00001	-1.93052	0.00120	0.84443	0.00141	7.80003	0.02550	4.43348	0.01470	0.00007	0.00000	-0.43731	0.00095	2.173094	1.53E-01	A-159	S	A-159	22.04.09
A-16	38.36922	0.00355	15.67151	0.00149	19.44830	0.00173	1.97282	0.00003	0.80580	0.00001	-1.82052	0.00422	7.91994	0.00425	6.05453	0.01730	3.73073	0.01020	0.00004	0.00000	-4.35087	0.01230	1.553903	4.28E-01	A-16'	S	A-16	30.03.09
A-16	38.37309	0.00240	15.67287	0.00101	19.45027	0.00128	1.97285	0.00003	0.80579	0.00001	-1.86505	0.00250	7.87312	0.00255	5.93100	0.02910	3.65306	0.01830	0.00004	0.00000	-4.21911	0.00712	1.582741	2.42E-01	A-16'	S	A-16	30.03.09
A-16	38.37453	0.00176	15.67379	0.00075	19.45136	0.00088	1.97285	0.00002	0.80581	0.00001	-1.82912	0.00109	7.90881	0.00127	9.12331	0.00416	5.59634	0.00267	0.00007	0.00000	-4.32395	0.00299	2.015935	1.24E-01	A-16'	S	A-16	20.04.09
A-16	38.37668	0.00185	15.67512	0.00074	19.45313	0.00087	1.97281	0.00002	0.80580	0.00001	-1.84433	0.00102	7.89675	0.00072	9.03289	0.00397	5.53554	0.00252	0.00006	0.00000	-4.28115	0.00259	2.281408	1.82E-01	A-16	S	A-16	20.04.09
A-16	38.37218	0.00203	15.67329	0.00075	19.45079	0.00092	1.97282	0.00002	0.80580	0.00001	-1.86858	0.00169	7.87139	0.00171	8.73574	0.02340	5.35083	0.01460	0.00006	0.00000	-4.21178	0.00452	2.382754	1.63E-01	A-16'	S	A-16	20.04.09
A-160	37.65576	0.00155	15.59259	0.00064	17.80111	0.00062	2.11541	0.00003	0.87597	0.00001	-1.75024	0.00259	0.77252	0.00259	7.82339	0.00679	3.28285	0.00274	0.00005	0.00000	-0.44145	0.00204	1.547546	3.27E-01	A-160	S	A-160	21.04.09
A-160	37.66098	0.00112	15.59518	0.00045	17.80297	0.00050	2.11539	0.00003	0.87596	0.00002	-1.78517	0.00121	0.74051	0.00132	7.80044	0.01330	3.26528	0.00581	0.00004	0.00000	-0.41462	0.00095	1.560776	3.25E-01	A-160	S	A-160	21.04.09
A-160	37.66152	0.00159	15.59483	0.00063	17.80319	0.00064	2.11543	0.00004	0.87596	0.00002	-1.79656	0.00138	0.72731	0.00123	7.68348	0.02930	3.22426	0.01270	0.00004	0.00000	-0.40426	0.00070	1.69123	7.58E-01	A-160	S	A-160	21.04.09
A-161	37.80383	0.00170	15.60679	0.00068	17.90690	0.00070	2.11108	0.00004	0.87154	0.00001	-1.77057	0.00147	0.96588	0.00095	5.04897	0.00577	2.55104	0.00299	0.00004	0.00000	-0.54551	0.00054	2.042115	2.25E-01	A-161	S	A-161	21.04.09
A-161	37.80786	0.00155	15.60786	0.00062	17.90836	0.00069	2.11121	0.00005	0.87156	0.00002	-1.78268	0.00171	0.94821	0.00118	4.84630	0.01150	2.44715	0.00573	0.00003	0.00000	-0.53249	0.00059	1.122204	4.57E-01	A-161	S	A-161	21.04.09
A-161	37.80856	0.00176	15.60905	0.00074	17.90976	0.00074	2.11104	0.00005	0.87153	0.00002	-1.78192	0.00156	0.95660	0.00151	4.89723	0.01320	2.46667	0.00654	0.00004	0.00000	-0.53685	0.00082	1.071778	3.93E-01	A-161	S	A-161	21.04.09
A-162	38.28906	0.00293	15.66687	0.00119	18.68545	0.00134	2.04917	0.00004	0.83846	0.00001	-1.97858	0.00143	3.83622	0.00222	2.76327	0.01180	4.16978	0.01870	0.00005	0.00000	-1.93745	0.00212	2.109097	5.47E-01	A-162	S	A-162	22.04.09
A-162	38.29034	0.00243	15.66691	0.00090	18.68525	0.00118	2.04920	0.00003	0.83848	0.00001	-1.97155	0.00191	3.83979	0.00238	2.85727	0.02180	4.34980	0.03410	0.00006	0.00000	-1.94848	0.00291	1.953161	1.12E-01	A-162	S	A-162	22.04.09
A-162	38.29091	0.00246	15.66753	0.00100	18.68719	0.00116	2.04912	0.00004	0.83846	0.00001	-1.95440	0.00220	3.86373	0.00229	2.87315	0.01820	4.37053	0.02760	0.00006	0.00000	-1.97527	0.00294	1.769687	9.47E-02	A-162	S	A-162	22.04.09
A-164	38.20729	0.00226	15.63815	0.00088	18.26346	0.00098	2.09198	0.00005	0.85625	0.00002	-1.76982	0.00159	1.90578	0.00137	4.04271	0.00352	3.40863	0.00283	0.00003	0.00000	-1.07607	0.00105	1.7715	2.25E-01	A-164	S	A-164	21.04.09
A-164	38.21143	0.00217	15.64018	0.00089	18.26569	0.00096	2.09203	0.00003	0.85629	0.00001	-1.76387	0.00131	1.90928	0.00109	4.03587	0.00263	3.40648	0.00223	0.00003	0.00000	-1.08214	0.00104	1.75906	1.98E-01	A-164	S	A-164	21.04.09
A-164	38.21229	0.00282	15.64054	0.00113	18.26387	0.00098	2.09212	0.00011	0.85630	0.00003	-1.69562	0.01930	1.93002	0.00753	2.84687	0.22500	2.39509	0.19000	0.00004	0.00000	-1.18239	0.02730	1.044354	3.37E-01	A-164	S	A-164	21.04.09
A-164	38.21244	0.00180	15.64084	0.00076	18.26530	0.00078	2.09207	0.00004	0.85631	0.00002	-1.75805	0.00149	1.91531	0.00133	3.97013	0.00637	3.34736	0.00557	0.00004	0.00000	-1.09064	0.00101	3.031729	6.04E-01	A-164	S	A-164	21.04.09
A-17	38.31567	0.00220	15.66600	0.00087	18.71533	0.00110	2.04729	0.00003	0.83707	0.00001	-1.84027	0.00142	4.06867	0.00131	6.42422	0.01790	3.75529	0.01060	0.00002	0.00000	-2.21077	0.00213	1.06029	3.87E-01	A-17'	S	A-17	30.03.09
A-17	38.59693	0.00351	15.70560	0.00141	20.04725	0.00181	1.92526	0.00003	0.78343	0.00001	-1.89115	0.00099	10.36851	0.00140	2.22368	0.00119	5.30171	0.00496	0.00003	0.00000	-5.48229	0.00298	1.386971	3.12E-01	A-17	S	A-17	24.02.09
A-17	38.32245	0.00225	15.66845	0.00094	18.71779	0.00112	2.04730	0.00003	0.83707	0.00001	-1.84961	0.00116	4.05971	0.00116	6.43922	0.00848	3.76455	0.00503	0.00003	0.00000	-2.19447	0.00165	1.762638	1.80E-01	A-17'	S	A-17	30.03.09
A-17	38.5881	0.00355	15.70211	0.00143	20.04244	0.00183	1.92533	0.00003	0.78344	0.00001	-1.86162	0.00090	10.39489	0.00172	2.22468	0.00172	5.36711	0.00280	0.00004	0.00000	-5.58528	0.00293	2.011829	2.89E-01	A-17	S	A-17	24.02.09
A-19	38.10622	0.00161	15.62518	0.00068	18.46336	0.00075	2.06388	0.00002	0.84627	0.00001	-1.69990	0.00201	3.37286	0.00198	5.82203	0.00348	5.18827	0.00314	0.00006	0.00000	-1.98463	0.00338	2.602464	2.34E-01	A-19	S	A-19	20.04.09
A-19	38.34727	0.00131	15.63612	0.00054	18.82503	0.00062	2.03701	0.00002	0.83057	0.00001	-1.58790	0.00098	4.84029	0.00067	8.80980	0.00798	5.52491	0.00280	0.00008	0.00000	-3.04790	0.00210	1.722177	9.02E-02	A-19	S	A-19	21.01.09
A-19	38.35159	0.00126	15.63697	0.00048	18.82539	0.00058	2.03723	0.00002	0.83063	0.00001	-1.99414	0.00188	4.42275	0.00177	10.13509	0.00776	6.55269	0.00396	0.00004	0.00000	-2.21740	0.00275	1.376288	1.12E-01	A-19	S	A-19	27.03.09
A-19	38.10437	0.00204	15.62398	0.00084	18.46204	0.00094	2.06390	0.00002	0.84626	0.00001	-1.69165	0.00229	3.38074	0.00246	5.80691	0.00589	5.16752	0.00586	0.00006	0.00000	-1.99774	0.00405	1.934005	5.13E-01	A-19'	S	A-19	20.04.09
A-21	38.41852	0.00107	15.64764	0.00048	18.77757	0.00048	2.04598	0.00002	0.83330	0.00001	-1.98637	0.00207	3.98849	0.00173	12.33319	0.01260	4.61238	0.00465	0.00005	0.00000	-2.00868	0.00275	1.767244	2.41E-01	A-21	S	A-21	27.03.09
A-21	38.4205	0.00103	15.64746	0.00042	18.77716	0.00049	2.04603	0.00003	0.83330	0.00001	-1.78220	0.00094	4.18858	0.00071	12.96018	0.00879	4.87929	0.00330	0.00005	0.00000	-2.35090	0.00141	2.565198	2.01E-01	A-21	S	A-21	13.02.09
A-21	38.42307	0.00119	15.64838	0.00046	18.77820	0.00042	2.04611	0.00002	0.83331	0.00001	-1.99042	0.00264	3.97770	0.00282	12.27083	0.01870	4.64906	0.00791	0.00004	0.00000	-1.99996	0.00407	2.467775	4.49E-01	A-21	S	A-21	27.03.09
A-23	38.11394	0.00117	15.63998	0.00049	18.31664	0.00054	2.08085	0.00002	0.85387	0.00001	-1.95691	0.00126	2.27162	0.00116	11.57488	0.00645	4.40962	0.00285	0.00004	0.00000	-1.16006	0.00123	1.368915	1.12E-01	A-23	S	A-23	27.03.09
A-23	38.11797	0.00084	15.64166	0.00033	18.31840	0.00041	2.08084	0.00002	0.85387	0.00001	-1.97671	0.00237	2.25072	0.00265	11.65739	0.00587	4.43456	0.00247	0.00005	0.00000	-1.13879	0.00271	2.765804	2.79E-01	A-23	S	A-23	27.03.09
A-23	38.11521	0.00113	15.64094	0.00043	18.31774	0.00047	2.08077	0.00003	0.85387	0.00001	-1.77908	0.00115	2.45269	0.00077	12.14958	0.01470	4.59186	0.00554	0.00005	0.00000	-1.37890	0.00101	2.871503	3.25E-01	A-23	S	A-23	13.02.09
A-26	37.74806	0.00570	15.51512	0.00229	18.06675	0.00269	2.08938	0.00003	0.85876	0.00001	-1.92873	0.00165	1.87571	0.00170	2.40690	0.00738	4.90314	0.01330	0.00002	0.00000	-0.97301	0.00157	0.7532944	3.12E-01	A-26	S	A-26	30.03.09
A-26	37.753	0.00096	15.51690	0.00036	18.07002	0.00034	2.08931	0.00002	0.85872	0.00001	-1.79555	0.00106	2.01291	0.00056	17.49339	0.01730	5.96039	0.00988	0.00004	0.00000	-1.12147	0.00087	1.454814	6.86E-01	A-26	S	A-26	13.02.09
A-26	37.76304	0.00483	15.52089	0.00196	18.07363	0.00227	2.08940	0.00004	0.85876	0.00002	-1.92011	0.00108	1.88325	0.00175	2.41579	0.00502	4.92450	0.01100	0.00002	0.00000	-0.98102	0.00125	0.9011307	3.39E-01	A-26	S	A-26	30.03.09
A-27	37.86788	0.00260	15.61600	0.00105	18.08168	0.00118	2.09430	0.00003	0.86364	0.00001	-1.92658	0.00184	1.63586	0.00122	8.26166	0.01480	2.97812	0.00573	0.00003	0.00000	-0.84994	0.00122	1.427522	2.44E-01	A-27	S	A-27	30.03.09
A-27	37.87264	0.00090	15.61762	0.00033	18.08382	0.00038	2.09429	0.00002	0.86364	0.00001	-1.79289	0.00097	1.76855	0.00061	10.66683	0.01700	3.94083	0.00783	0.00004	0.00000	-0.98586	0.00060	1.929712	4.42E-01	A-27	S	A-27	13.02.09
A-27	37.87965	0.00173	15.62049	0.00076	18.08653	0.00085	2.09430	0.00003	0.86365	0.00001	-1.93517	0.00171	1.62721	0.00158	8.26424	0.02430	2.99233	0.00822	0.00003	0.00000	-0.84068	0.00142	1.311015	1.77E-01	A-27	S	A-27	30.03.09
A-28,1	37.97503	0.00155	15.61062	0.00053	18.27137	0.00062	2.07847	0.00004	0.85439	0.00001	-2.05023	0.00149	2.29554	0.00086	8.13365	0.00755	2.73713	0.00455	0.00004	0.00000	-1.12031	0.00082	2.283324	3.71E-01	A-28,1	S	A-28,1	23.02.09
A-28,1	37.97714	0.00163	15.61149	0.00064	18.27130	0.00062	2.07852	0.00004	0.85443	0.00001	-2.04818	0.00131	2.29582	0.00095	8.31407	0.00471	2.79552	0.00283	0.00002	0.00000	-1.12078	0.00073	0.632208	5.58E-01	A-28,1	S	A-28,1	23.02.09
A-28,1	37.97459	0.00124	15.61093	0.00046	18.27159	0.00052	2.07840	0.00003	0.85440	0.00001	-2.05236	0.00119	2.29856	0.00100	8.09116	0.00960	2.67356	0.00325	0.00003	0.00000	-1.12020	0.00072	1.348584	3.97E-01	A-28,1	S	A-28,1	23.02.09
A-28,2	37.98231	0.00145	15.61296	0.00057	18.27099	0.00052	2.07885	0.00004	0.85454	0.00002	-2.03531	0.00139	2.29218	0.00102	8.88455	0.00780	2.97214	0.00262	0.00004	0.00000	-1.12572	0.00070	1.829599	2.91E-01	A-28,2	S	A-28,2	23.02.09
A-28,2	37.98601	0.00155	15.61552	0.00060	18.27363	0.00049	2.07877	0.00005	0.85454	0.00002	-2.04356	0.00147	2.28617	0.00110	8.86314	0.00832	2.96123	0.00293	0.00005	0.00000	-1.11999	0.00054	2.720599	4.33E-01	A-28,2	S	A-28,2	23.02.09
A-28,2	37.98882	0.00130	15.61605	0.00050	18.27424	0.00049	2.07884	0.00003	0.85454	0.00001	-2.03570	0.00122	2.29186	0.00089	8.83892	0.00548	2.94738	0.00178	0.00004	0.00000	-1.12497	0.00083	1.779003	2.62E-01	A-28,2	S	A-28,2	23.02.09
A-29	38.17369	0.00235	15.63518	0.00087	18.28461	0.00101	2.08777	0.00003	0.85510	0.00001	-1.92933	0.00157	1.95603	0.00124	9.16128	0.01550	3.53803	0.00585	0.00003	0.00000	-1.01474	0.00121	1.457962	6.57E-01	A-29	S	A-29	30.03.09
A-29	38.17423	0.00101	15.63524	0.00038	18.28512	0.00039	2.08773	0.00002	0.85507	0.00001	-1.80671	0.00075	2.08094	0.00076	12.18541	0.00920	4.82043	0.00392	0.00005	0.00000	-1.15179	0.00054	1.488845	1.16E-01	A-29	S	A-29	13.02.09
A-29	38.1748	0.00323	15,64232,91848	0.00009	18.25042	0.00102	2.08798	0.00003	0.85510	0.00001	0.62515	0.76200	2.65813	0.21400	4.46131	0.63600	1.71578	0.24500	0.00002	0.00000	-0.69022	0.12000	1.595216	2.69E-01	A-29	S	A-29	30.03.09
A-34	38.46543	0.00176	15.66152	0.00072	19.36188	0.00093	1.98666	0.00002	0.80889	0.00001	-1.93669	0.00114	7.07903	0.00100	7.23122	0.01920	4.14390	0.01140	0.00004	0.00000	-3.65619	0.00245	2.062491	3.00E-01	A-34	S	A-34	30.03.09
A-34	38.46553	0.00141	15.66216	0.00056	19.36258	0.00071	1.98663	0.00002	0.80888	0.00001	-1.85517	0.00097	7.16212	0.00086	8.33776	0.01356	4.75628	0.00843	0.00004	0.00000	-3.87106	0.00224	1.70777	0.33550	A-34	S	A-34	13.02.09
A-34	38.46779	0.00105	15.66279	0.00040	19.36328	0.00048	1.98660	0.00002	0.80887	0.00001	-1.77365	0.00081	7.24521	0.00072	9.44430	0.00792	5.36866	0.00545	0.00004	0.00000	-4.08593	0.00203	1.353058	3.71E-01	A-34	S	A-34	13.02.09
A-35	37.63987	0.00110	15.57986	0.00037	17.93142	0.00040	2.09912	0.00003	0.86887	0.00001	-1.99039	0.00127	1.33288	0.00101	16.08757	0.01610	3.54565	0.00361	0.00004	0.00000	-0.66951	0.00064	0.8677704	4.75E-01	NA35	S	A-35	23.02.09
A-36	38.60115	0.00151	15.70222	0.00059	20.08281	0.00062	1.92209	0.00003	0.78188	0.00001	-2.04755	0.00143	10.38404	0.00106	9.57625	0.00799	3.41909	0.00238	0.00003	0.00000	-5.07135	0.00352	1.043716	5.19E-01	A-36	S	A-36	23.02.09
A-36	38.60201	0.00141	15.70289	0.00057	20.08381	0.00063	1.92207	0.00003	0.78188	0.00001	-2.04322	0.00123	10.38932	0.00089	9.79689	0.01250	3.50267	0.00548	0.00003	0.00000	-5.08482	0.00322	0.9679699	1.99E-01	A-36	S	A-36	23.02.09
A-36	38.60257	0.00144	15.70342	0.00056	20.08481	0.00060	1.92198	0.00004	0.78187	0.00002	-2.04914	0.00142	10.38746	0.00116	9.63372	0.00667	3.41685	0.00239	0.00003	0.00000	-5.06938	0.00326	1.094548	4.51E-01	A-36	S	A-36	23.02.09
A-82	38.4526	0.00113	15.65382	0.00042	18.85935	0.00041	2.03891	0.00003	0.83003	0.00001	-2.00473	0.00113	4.32854	0.00093	12.17682	0.00994	3.50785	0.00259	0.00004	0.00000	-2.15970	0.00124	1.530329	1.95E-01	NA 82	S	A-82	23.02.09
A-82	38.45412	0.00137	15.65416	0.00054	18.85954	0.00055	2.03898	0.00002	0.83005	0.00001	-1.99909	0.00127	4.32962	0.00109	12.18179	0.01310	3.52562	0.00431	0.00004	0.00000	-2.16668	0.00155	0.7294808	4.06E-01	NA 82	S	A-82	23.02.09
A-82	38.45868	0.00108	15.65571	0.00040	18.86147	0.00037	2.03897	0.00003	0.83003	0.00001	-1.99647	0.00113	4.33281	0.00077	12.33481	0.00841	3.58068	0.00218	0.00003	0.00000	-2.17073	0.00109	1.277956	1.87E-01	NA 82	S	A-82	23.02.09
A-83	38.22022	0.00160	15.65809	0.00069	18.66848	0.00081	2.04730	0.00002	0.83875	0.00001	-2.01239	0.00102	3.89553	0.00103	5.53706	0.00673	3.35509	0.00518	0.00002	0.00000		0.00122	0.6104483	2.62E-01	A-83	S	A-83	23.02.09
A-83	38.22973	0.00201	15.66163	0.00085	18.67088	0.00098	2.04752	0.00002	0.83882	0.00001	-1.92000	0.00131	3.97560	0.00098	8.85616	0.01620	5.14956	0.00931	0.00005	0.00000	-2.06972	0.00176	2.226178	1.37E-01	A-83'	S	A-83	20.04.09
A-83	38.23391	0.00170	15.66420	0.00066	18.67312	0.00081	2.04757	0.00002	0.83885	0.00001	-1.94251	0.00134	3.95092	0.00139	9.01591	0.00594	5.25447	0.00348	0.00006	0.00000	-2.03442	0.00199	1.878448	1.36E-01	A-83'	S	A-83	20.04.09
A-86	38.47459	0.00148	15.65066	0.00057	18.83421	0.00064	2.04276	0.00002	0.83095	0.00001	-1.83986	0.00098	4.29633	0.00103	10.85636	0.00939	5.56817	0.00486	0.00006	0.00000	-2.33506	0.00165	2.015583	1.13E-01	A-86	S	A-86	20.04.09
A-86	38.47479	0.00110	15.65066	0.00041	18.83456	0.00046	2.04278	0.00002	0.83095	0.00001	-1.85946	0.00103	4.27734	0.00083	10.85586	0.00575	5.56830	0.00306	0.00006	0.00000	-2.30021	0.00145	2.688117	5.04E-01	A-86	S	A-86	20.04.09
A-86	38.47611	0.00108	15.65115	0.00041	18.83518	0.00048	2.04278	0.00002	0.83096	0.00001	-1.86812	0.00128	4.26786	0.00102	10.72036	0.00371	5.48715	0.00208	0.00006	0.00000	-2.28479	0.00191	2.357673	2.25E-01	A-86	S	A-86	20.04.09
A-87	38.39437	0.03170	15.61557	0.01300	18.85338	0.01560	2.03655	0.00022	0.82832	0.00007	-1.52194	0.00824	4.93824	0.00633	0.20382	0.00080	0.11219	0.00045	0.00005	0.00000	-3.24301	0.01740	2.57974	4.40E-01	A-87	S	A-87	21.04.09
A-87	38.5091	0.03080	15.66350	0.01230	18.90731	0.01420	2.03685	0.00020	0.82847	0.00006	-1.50849	0.00855	4.93411	0.00519	0.20602	0.00093	0.11349	0.00052	0.00005	0.00000	-3.26776	0.01950	2.233281	2.39E-01	A-87	S	A-87	21.04.09
A-87	38.52714	0.02500	15.67063	0.00990	18.91989	0.01170	2.03635	0.00022	0.82822	0.00006	-1.47955	0.00703	4.98108	0.00560	0.23935	0.00570	0.13207	0.00320	0.00006	0.00000	-3.37312	0.01540	2.631944	2.57E-01	A-87	S	A-87	21.04.09
B-16	38.32559	0.00140	15.66895	0.00058	18.71915	0.00058	2.04747	0.00003	0.83708	0.00001	-2.04135	0.00109	3.85879	0.00073	8.44388	0.00770	3.81497	0.00369	0.00006	0.00000	-1.89024	0.00099	1.991326	1.68E-01	B-16	S	B-16	23.02.09
B-16	38.32550	0.00143	15.66945	0.00058	18.71991	0.00058	2.04742	0.00003	0.83706	0.00001	-2.04497	0.00117	3.85731	0.00087	8.40075	0.00735	3.78673	0.00323	0.00006	0.00000	-1.88607	0.00110	1.83951	0.14600		S	B-16	23.02.09
B-16	38.32795	0.00146	15.66994	0.00058	18.72067	0.00057	2.04738	0.00004	0.83704	0.00001	-2.04859	0.00125	3.85583	0.00102	8.35761	0.00699	3.75848	0.00277	0.00005	0.00000	-1.88190	0.00121	1.687698	1.24E-01	B-16	S	B-16	23.02.09
