# Supplementary material for: Use of lead isotopic ratios to discriminate glass samples in forensic science
Source: Royal Society of Chemistry journal article supplement (doi:10.1039/c0ja00054j), 2010-10-05
Supplement: c0ja00054j.pdf [file c0ja00054j.pdf]

**Table 1 Glass samples from National Criminal Investigation Service (NCIS) glass collection used in this work**

| ID      | Type                                             | Source                         |
|---------|--------------------------------------------------|--------------------------------|
| A-01-II | Pilkington Optiherm 4-15-4bv, float glass, lot 3 | Pilkington glass manufacturer  |
| A-02-1  | Pilkington Optiherm 4-15-4bv, float glass, lot 2 | Pilkington glass manufacturer  |
| A-03-1  | Pilkington Optiherm 4-15-4bv, float glass, lot 3 | Pilkington glass manufacturer  |
| A-04    | Reinforced glass                                 | Pilkington glass manufacturer  |
| A-06    | Float glass, green                               | Pilkington glass manufacturer  |
| A-07    | Float glass                                      | Pilkington glass manufacturer  |
| A-08    | Green glass, sand blasted                        | Pilkington glass manufacturer  |
| A-09    | OptiWhite™                                       | Pilkington glass manufacturer  |
| A-10    | Blue special glass                               | Pilkington glass manufacturer  |
| A-11-I  | Decorative glass, brown, ornamented, 4mm         | Pilkington glass manufacturer  |
| A-12    | Decorative glass, "white", ornamented, 4mm       | Pilkington glass manufacturer  |
| A-13    | Decorative glass, black, ornamented, 4mm         | Pilkington glass manufacturer  |
| A-14    | Glass, enamel, 4mm                               | Pilkington glass manufacturer  |
| A-16    | Float glass 3mm thickness                        | Oslo Glass and Window          |
| A-17    | Unknown                                          | Oslo Glass and Window          |
| A-18    | Culture Glass (trade name), non float            | Oslo Glass and Window          |
| A-19    | Float glass 10 mm                                | Oslo Glass and Window          |
| A-21    | Black, decorative glass, float                   | Oslo Glass and Window          |
| A-22    | Decorative glass "Antic Blue"                    | Oslo Glass and Window          |
| A-23    | Float glass, 3 mm, green                         | Oslo Glass and Window          |
| A-24    | Float glass, 8 mm                                | Oslo Glass and Window          |
| A-26    | Float glass, 6mm                                 | Oslo Glass and Window          |
| A-28-1  | Laminated float glass 4 mm (see A-28-2)          | Oslo Glass and Window          |
| A-28-2  | Laminated float glass 4 mm(see A-28-1)           | Oslo Glass and Window          |
| A-29    | Pre-treated glass, acid,                         | Oslo Glass and Window          |
| A-30    | Satimat 4mm                                      | Oslo Glass and Window          |
| A-33-I  | Laminated sec- glass, outer pane                 | Oslo Glass and Window          |
| A-33-II | Laminated sec- glass, inner pane                 | Oslo Glass and Window          |
| A-34    | Float glass, 3 mm                                | Oslo Glass and Window          |
| A-35    | Float glass, 12 mm                               | Oslo Glass and Window          |
| A-36    | Float glass, 4mm                                 | Oslo Glass and Window          |
| A-38    | Glass, decorative, darkened ("Black")            | Oslo Glass and Window          |
| A-82    | Float glass, 4mm                                 | Arctic Glass, Kirkenes, Norway |
| A-83    | Float glass, 2mm                                 | Arctic Glass, Kirkenes, Norway |
| A-86    | Float glass, 5 mm                                | Arctic Glass, Kirkenes, Norway |
| A-87    | Float glass, 6 mm                                | Arctic Glass, Kirkenes, Norway |
| A-105   | Float glass, 5mm                                 | Nessø Glass, Levanger, Norway  |
| A-107   | Float glass, 4mm                                 | Nessø Glass, Levanger, Norway  |
| A-119   | Float glass, 3mm                                 | NCIS, case work                |
| A-120   | Float glass, 4mm                                 | NCIS, case work                |

Supplementary Material (ESI) for Journal of Analytical Atomic Spectrometry  
This journal is © The Royal Society of Chemistry 2010

|       |                                                 |                    |
|-------|-------------------------------------------------|--------------------|
| A-135 | Darkened glass, 3mm                             | Harstad Glass AS   |
| A-137 | Float glass, 4mm, green tinted                  | Harstad Glass AS   |
| A-138 | Float glass, 4mm, green tinted                  | Harstad Glass AS   |
| A-139 | Float glass, 4mm, green tinted                  | Harstad Glass AS   |
| A-141 | Float glass, 4mm, green tinted                  | Harstad Glass AS   |
| A-158 | Glass container, non float, jar, old            | Hadeland Glassverk |
| A-159 | Glass container for tomato sauce (Dolmio)       | N.A.               |
| A-160 | Glass container for asparagus                   | N.A.               |
| A-161 | Glass container, bottle, green, for lemon juice | N.A.               |
| A-162 | Glass container, old, unknown origin            | N.A.               |
| A-164 | Glass container, unknown origin, street sample  | N.A.               |
| B-16  | Glass, street sample, unknown origin            | N.A.               |

---
